# Supplementary material for: A subset of gastric cancers with EGFR amplification and overexpression respond to cetuximab therapy
Source: PubMed Central journal article supplement (PMC3801116; doi:10.1038/srep02992), 2013-10-21
Supplement: srep02992-s1.pdf [file srep02992-s1.pdf]

**A subset of gastric cancers with EGFR amplification and overexpression  
respond to cetuximab therapy**

**Authors**

Lianhai Zhang,<sup>1,5</sup> Jie Yang,<sup>3,5</sup> Jie Cai,<sup>3</sup> Xiaoming Song,<sup>3</sup> Jianyun Deng,<sup>3</sup> Xuesong Huang,<sup>3</sup> Dawei Chen,<sup>3</sup> Mengmeng Yang,<sup>3</sup> Jean-Pierre Wery,<sup>3</sup> Shuangxi Li,<sup>1</sup> Aiwen Wu,<sup>1</sup> Ziyu Li,<sup>1</sup> Zhongwu Li,<sup>2</sup> Yiqiang Liu,<sup>2</sup> Yiyu Chen,<sup>3</sup> Qixiang Li,<sup>3,4\*</sup> and Jiafu Ji<sup>1\*</sup>

**Supplement:****Supplementary Table 1.** Clinicopathological parameters of GC patients and the pathology confirmation of corresponding PDX models.

| ID     | Sex | Tumor Size<br>(cm) | Depth of Wall<br>Invasion | Lymph Node<br>Metastasis | Distant<br>Metastasis | TNM stages | Histology<br>(patients and PDX) | Differentiation   |
|--------|-----|--------------------|---------------------------|--------------------------|-----------------------|------------|---------------------------------|-------------------|
| GA0006 | M   | >5.0               | T4a                       | N1                       | M0                    | IIIa       | adenocarcinoma                  | moderately-poorly |
| GA0022 | M   | ≤5.0               | T4a                       | N2                       | M0                    | IIIb       | adenocarcinoma                  | moderately-poorly |
| GA0023 | F   | ≤5.0               | T4a                       | N2                       | M0                    | IIIb       | adenocarcinoma                  | poorly            |
| GA0025 | F   | ≤5.0               | T4a                       | N1                       | M0                    | IIIa       | signet-ring cell carcinoma      | poorly            |
| GA0033 | M   | >5.0               | T4a                       | N0                       | M0                    | IIb        | adenocarcinoma                  | poorly            |
| GA0037 | M   | ≤5.0               | T4a                       | N0                       | M0                    | IIb        | adenocarcinoma                  | poorly            |
| GA0044 | M   | lesion from liver  | n/a                       | n/a                      | M1                    | IV         | adenocarcinoma                  | moderately-poorly |
| GA0046 | M   | >5.0               | T4a                       | N2                       | M0                    | IIIb       | adenocarcinoma                  | poorly            |
| GA0055 | F   | ≤5.0               | T4a                       | N3b                      | M0                    | IIIc       | adenocarcinoma                  | moderately        |
| GA0060 | M   | ≤5.0               | T4a                       | N3a                      | M0                    | IIIc       | adenocarcinoma                  | moderately-poorly |
| GA0075 | F   | >5.0               | T4a                       | N1                       | M0                    | IIIa       | adenocarcinoma                  | moderately-poorly |
| GA0080 | M   | >5.0               | T4a                       | N2                       | M0                    | IIIb       | adenocarcinoma                  | moderately-poorly |
| GA0098 | M   | ≤5.0               | T4a                       | N0                       | M0                    | IIb        | adenocarcinoma                  | moderately        |
| GA0114 | F   | >5.0               | T4a                       | N1                       | M0                    | IIIa       | adenocarcinoma                  | moderately-poorly |
| GA0119 | M   | >5.0               | T4a                       | N3b                      | M0                    | IIIc       | adenocarcinoma                  | poorly            |
| GA0138 | M   | >5.0               | T2                        | N1                       | M0                    | IIa        | adenocarcinoma                  | poorly            |
| GA0139 | M   | >5.0               | T4a                       | N0                       | M0                    | IIb        | adenocarcinoma                  | well              |
| GA0151 | F   | >5.0               | T4a                       | N1                       | M0                    | IIIa       | adenocarcinoma                  | moderately-poorly |
| GA0152 | F   | >5.0               | T4a                       | N0                       | M0                    | IIb        | adenocarcinoma                  | poorly            |
| GA2140 | M   | >5.0               | T4a                       | N0                       | M0                    | IIb        | adenocarcinoma                  | moderately-poorly |

\* Stage of GC was classified according to 7<sup>th</sup> edition tumor-node-metastasis (TNM) classification recommended by the International Union Against Cancer.

**Supplementary Table 2.** Panel of primers used for mutation analyses.

| <b>Mutation</b> | <b>Primers</b>                                                                   |
|-----------------|----------------------------------------------------------------------------------|
| <i>EGFR</i>     |                                                                                  |
| Exon 18         | Forward 5'-CATGGTGAGGGCTGAGGTGA-3'<br>Reverse 5'-CCCCACCAGACCATGAGAGG-3'         |
| Exon 19         | Forward 5'-GTGCATCGCTGGTAACATCCA-3'<br>Reverse 5'-GGAGATGAGCAGGGTCTAGAGCA-3'     |
| Exon 20         | Forward 5'-CGCATTCATGCGTCTTCACC-3'<br>Reverse 5'-CTATCCCAGGAGCGCAGACC-3'         |
| Exon 21         | Forward 5'-TGGCATGAACATGACCCTGAA-3'<br>Reverse 5'-CAGCCTGGTCCCTGGTGTC-3'         |
| <i>KRAS</i>     |                                                                                  |
| Exon 2          | Forward 5'-TTATGTGTGACATGTTCTAAT-3'<br>Reverse 5'-AGAATGGTCCTGCACCAGTAA-3'       |
| Exon 3          | Forward 5'-TCAAGTCCTTTGCCCATTTT-3'<br>Reverse 5'-TGCATGGCATTAGCAAAGAC-3'         |
| Exon 4          | Forward 5'-TTGTGGACAGGTTTTGAAAGA-3'<br>Reverse 5'-AGAAGCAATGCCCTCTCAAG-3'        |
| <i>BRAF</i>     |                                                                                  |
| Exon 15         | Forward 5'-CTCTTCATAATGCTTGCTC-3'<br>Reverse 5'-GTGAATACTGGGA ACTATG-3'          |
| <i>c-MET</i>    |                                                                                  |
| Exon 14         | Forward 5'-TGGGCACTGGGTCAAAGTCTC-3'<br>Reverse 5'-ACAATGTCAACAACCCACTGAGGTA-3'   |
| Exon 16         | Forward 5'-ATTAAATGTTACGCAGTGCTAAC-3'<br>Reverse 5'-GGTTGCAAACCACAAAAGTAT-3'     |
| Exon 17         | Forward 5'-GTATTCAGTGTTCATAATGAAGT-3'<br>Reverse 5'-GATGGCTGGCTTACAGCTAGTT-3'    |
| Exon 18         | Forward 5'-AACAGTAGATGCTTAGTTTATGCT-3'<br>Reverse 5'-AACAGATTCCTCCTTGTC ACTT-3'  |
| Exon 19         | Forward 5'-TTCTATTTT CAGCCACGGGTAAT-3'<br>Reverse 5'-ATGAAAGTAAAAGAGGAGAAACTC-3' |
| Exon 21         | Forward 5'-CACCC TAAAGCCGAAATGCG-3'<br>Reverse 5'-CAAGGAGCAAAGAATATCGATGGC-3'    |
| <i>PI3KCA</i>   |                                                                                  |
| Exon 1          | Forward 5'-CTCCACGACCATCATCAGG-3'<br>Reverse 5'-GATTACGAAGGTATTGGTTTAGACAG-3'    |
| Exon 9          | Forward 5'-GATTGGTTCTTTCCTGTCTCTG-3'<br>Reverse 5'-CCACAAATATCAATTTACAACCATTG-3' |
| Exon 20         | Forward 5'-TGGGGTAAAGGGAATCAAAG-3'<br>Reverse 5'-CCTATGCAATCGGTCTTTGC-3'         |
